# Supplementary material for: Ultrasensitive Photodetector Enabled by Atomic-Level Optimization of Graphene-based Heterojunctions
Source: Research Square preprint supplement (doi:10.21203/rs.3.rs-7303750/v1), 2025-09-03
Supplement: Supplementary file 1 [file 383c059b279d0d2426eadb5d.docx]

**Supplementary Information**

**Ultrasensitive Photodetector Enabled by Atomic-Level Optimization of Graphene-based Heterojunctions**

Zhening Fang1†, Jihong Wang2†, Wenhao Liu3†, Zhiheng Liang4†, Qiubo Pan3, Peng Lu5, Bin Cui5, Xiaowei Lu6, Jianhua Jiang6, Yuan Li7, Zhen Gu2*, Peng Xiu4*, Huifeng Wang2*, Haiping Fang3, 8, 9*

*1*Center for Transformative Science, Shanghai Tech University, Shanghai 200237, China

*2*Key Laboratory of Smart Manufacturing in Energy Chemical Process Ministry of Education, East China University of Science and Technology, Shanghai 200237, China

*3*School of Physics, East China University of Science and Technology, Shanghai 20023, China

*4*Department of Engineering Mechanics, Zhejiang University, Hangzhou 310027, China

*5*School of Physics, National Demonstration Center for Experimental Physics Education, Shandong University, Jinan 250100, China

*6*Suzhou Institute for Advanced Research, University of Science and Technology of China, Suzhou 215123, China

*7*School of Information Science and Engineering, Shandong University, Qingdao 266237, China

*8*School of Physics, Zhejiang University, Hangzhou 310027, China

9Wenzhou Institute, University of Chinese Academy of Sciences; Zhejiang 325000, China

† These authors contributed equally to this work

*Corresponding Authors: fanghaiping@sinap.ac.cn, whuifeng@ecust.edu.cn, xiupeng2011@zju.edu.cn, guzhen@ecust.edu.cn

**Table of contents**

Supplementary Table 1: Metrics and physical parameters of current state-of-the-art photodetectors.

Supplementary Fig. 1: Photocurrent at various pressures of 0, 20, 40, 100 and 240 kPa, respectively, under the visible-light of 635 nm illumination.

Supplementary Fig. 2: Rise (*τ*r) and decay (*τ*d) times of the photodetector without external pressure.

Supplementary Fig. 3: Transient absorption (TA) spectra of the unoptimized CuPC@GO membrane.

Supplementary Fig. 4: Ultraviolet-visible spectroscopy (UV-vis) results of CuPC and GO.

Supplementary Fig. 5: Performances for the CuPC@GO photodetector in a small package at different time spots.

Supplementary Fig. 6: Stability of the CuPC@GO photodetector.

Supplementary Fig. 7: CuPC@GO-based photodetector array for ultrasensitive imaging.

Supplementary references.

**Supplementary Table 1. Metrics and physical parameters of current state-of-the-art photodetectors.**

| **Classific-ation** | **Year** | **Active**  **materials** | **Illustration power**  **(Spectral region)** | **Responsivity**  **(A/W)** | **Rising time**  **(μs)** | **Ref.** | **Notes** |
| --- | --- | --- | --- | --- | --- | --- | --- |
| **1-10 nW** | | | | | | | |
| inorganic | 2014 | InSe/SiO2 | 4.389 nW  (UV) | 157 | 50 ms | 1 |  |
| inorganic | 2022 | TiS3/MoS2 | 3.6 nW  (UV −NIR) | 4.9 × 104 | 0.4 s | 2 |  |
| organic | 2019 | 2,6-DPA | 5.04 nW  / | 1.3 × 105 | / | 3 |  |
| organic | 2018 | TFT-CN | 5 nW  (NIR) | 9 × 104 | / | 4 |  |
| inorganic | 2024 | Sr2Nb3O10 | ~3 nW  (UV) | 5.5 × 103 | / | 5 |  |
| inorganic | 2014 | Graphene | ~3 nW  (Vis) | ~2 × 103 | / | 6 |  |
|  | 2024 | CuPC/GO | 3 nW  (UV −NIR)  **10-100 nW** | 1.5 × 107 | 30 μs | **This work** |  |
| organic | 2013 | DPP-DTT/  PCBM | 20 nW  (NIR) | 8 × 105 | 29 ms | 7 |  |
| organic | 2017 | CuPC/para-Sexiphenyl | 32.56 nW  (UV) | 430 | / | 8 |  |
| inorganic | 2013 | Carbon-Fiber/  ZnO-CdS | 89.9 nW  (UV-Vis)  **100-1000 nW** | 1.9 × 105 | 0.2 s | 9 | -0.4%  strain |
| inorganic | 2015 | Optical Fiber/ZnO-CdS | 300 nW  (UV-Vis) | 1.2 × 104 | 20 ms | 10 | -0.85%  strain |
| hybrid | 2022 | CdSe/ZnS QD/PDPP2T-TT-OD | 832.5 nW  (Vis) | 1.3 × 10-5 | 0.31 s | 11 |  |
| inorganic | 2016 | rGO/MoS2 | 660 nW  (Vis) | 5.5 × 10-3 | / | 12 | 0.03%  strain |
| organic | 2020 | [R-β-MPA]2MAPb2I7 | 300 nW  (Vis) | 3.8 | 3.5 ms | 13 |  |
| organic | 2017 | CH3NH3PbI3 | 370 nW (Vis-NIR) | 81 | 0.38 s | 14 |  |
| inorganic | 2013 | Graphene/Si | 310 nW  (IR) | 0.13 | / | 15 |  |
| inorganic | 2022 | Graphene/Si | 100 nW  (Vis-IR) | 6.0 × 104 | 1 μs | 16 |  |
| organic | 2024 | Graphene | 400nW  (NIR-MIR) | 40 | / | 17 |  |
|  | 2024 | CuPC/GO | 100 nW  (UV −NIR)  **1-10 μW** | 4.8 × 105 | 30 μs | **This work** |  |
| inorganic | 2018 | ZnO-Ga2O3  Microwire | 1.994 μW  (UV) | 2.3 × 103 | 0.3 s | 17 | -0.089%  strain |
| hybrid | 2017 | CsPbBr3 QD/  DNTT | 2 μW  (Vis) | 1.7 × 104 | 50 ms | 18 |  |
| inorganic | 2017 | PtS2/h-BN | 3.1 μW  (Vis) | 1.6 × 103 | 0.46 s | 19 |  |
| inorganic | 2016 | WS2/AuNP | 10 μW  (Vis) | 1.1 × 103 | 10 s | 20 |  |
| inorganic | 2012 | ZnO | 1.25 μW  (UV) | 1.0 × 103 | 142 μs | 21 |  |
| hybrid | 2019 | PVK/ZnO/GO | 3.31 μW  (UV) | 81 | 0.15 s | 22 | -1.1%  strain |
| organic | 2020 | P3HT:ICBA | 1 μW  (Vis) | 0.27 | 35 μs | 23 |  |
| organic | 2020 | P3HT:PC70BM | 1 μW  (Vis-NIR) | 14 | / | 24 |  |
| organic | 2011 | Anthracene-  DTT | 1.4 μW  (Vis) | 1.1 × 104 | / | 25 |  |
| hybrid | 2019 | MAPbI3/  CdS NA | 3.78 μW  (Vis) | 0.48 | 0.54 s | 26 |  |
| organich | 2018 | P3HT:PCBM | 1.5 μW  (Vis) | 0.086 | / | 27 |  |
| inorganic | 2017 | Graphene/SiC | 5 μW  (Vis) | 18 | / | 28 |  |
| inorganic | 2017 | Fluorographene | 5 μW  (UV-Vis) | 1.5 × 103 | 80 ms | 29 |  |
| inorganic | 2017 | Graphene/WS2/MoS2 | 4.76 μW  (Vis) | 1.0 × 103 | / | 30 |  |
| inorganic | 2014 | WSe2 | 8 μW  (Vis) | 0.21 | / | 31 |  |
| inorganic | 2013 | Graphene/Si | ~1 μW | 0.1 | / | 32 |  |
|  | 2024 | CuPC/GO | 1 μW  (UV −NIR)  **10-100 μW** | 4.99 × 104 | 30 μs | **This work** |  |
| inorganic | 2020 | CdSe/CdTe  NA | 50 μW  (UV −IR) | 0.025 | 0.7 s | 33 | 35 kgf |
| inorganic | 2020 | CsPbBr3 QD | 19.8 μW  (Vis) | 10 | / | 34 |  |
| inorganic | 2020 | MoTe2 | 30 μW  (NIR) | 0.50 | / | 35 |  |
| inorganic | 2017 | MoTe2/Si | 19 μW  (NIR) | 4.8 × 10-3 | / | 36 |  |
| inorganic | 2021 | Si/SiN | 10 μW  (Vis) | 0.83 | / | 37 |  |
| organic | 2009 | ABT | 30 μW  (Daylight) | 1.0 × 103 | / | 38 |  |
| organic | 2020 | PTB7-Th/  CO1-4Cl | 54 μW  (Vis-NIR) | 0.50 | / | 39 |  |
| organic | 2024 | PTAA:DRCN5T/P3HT:PC71BM | 57μW  (UV) | 94 | 35ms | 40 |  |
| organic | 2023 | (PCE10):BTPV-4F-eC9 | 20μW  (NIR)  **100-1000 μW** | 0.56 | 8μs | 41 |  |
| inorganic | 2015 | ZnO/ZnS NA | 780 μW  (UV-Vis) | 0.20 | 1 s | 42 | 0.40 kgf |
| inorganic | 2015 | CdSe/  ZnTe NA | 300 μW  (UV-Vis) | 1.6 × 10-3 | 0.1 s | 43 | 0.30 kgf |
| inorganic | 2015 | ZnO NA | 130 μW  (UV) | 0.027 | / | 44 | -0.6%  strain |
| inorganic | 2020 | Ag/ZnO/  PbS QD | 500 μW  (UV-Vis) | 20 | 1 ms | 45 |  |
| organic | 2022 | (PMA)2PbCl4 Single-Crystal Array | 318 μW  (UV) | 0.16 | 73 μs | 46 | 0.71%  strain |
| organic | 2023 | PVDF/DMF/  water | 640 μW  (Vis) | 2.4 × 10-5 | 0.43 s | 47 | 3.1%  strain |
| inorganic | 2019 | InSe/GaSe | 300 μW  (Vis) | 84 | 20 ms | 48 |  |
| inorganic | 2019 | Ti3C2 | 300 μW  (Vis-NIR) | 0.28 | / | 49 |  |
| inorganic | 2015 | ZnO Networks | 450 μW  (UV) | 13 | / | 50 |  |
| organic | 2015 | CH3NH3PbI3 | 600 μW  (UV-NIR) | 56 | 5.7 μs | 51 |  |
| hybrid | 2023 | CuPC/Ga2O3 | 100 μW  (UV) | 5.5 × 10-4 | 30 ms | 52 |  |
| inorganic | 2017 | Graphene/  MoTe2 | 150 μW  (Vis) | 0.20 | / | 53 |  |
| organic | 2009 | PDDTT/  PC60BM | 220 μW  (UV-NIR) | 0.17 | / | 54 |  |
|  | 2024 | CuPC/GO | 100 μW  (UV-NIR)  **1 mW-100 mW** | 540 | 30 μs | **This**  **work** |  |
| inorganic | 2016 | GaN  membrane | 3.5 mW  (UV) | 0.030 | 0.1 s | 55 | 1%  strain |
| inorganic | 2017 | Si/CdS NA | 3 mW  (NIR) | 19 | 9.7 s | 56 | -0.16‰  strain |
| inorganic | 2021 | ZnO/GaN NA | 20 mW  (UV) | 0.37 | / | 57 | 0.56%  strain |
| inorganic | 2017 | α-CsPbI3/  NaYF4:Yb,Er QD | 10 mW  (UV-IR) | 1.5 | 5 ms | 58 |  |
| hybrid | 2017 | PEDOT:PSS/  ZnO NA | 2.3 mW  (UV) | 5.5 × 10-3 | 0.1 s | 59 | 0.45%  strain |
| organic | 2018 | CH3NH3PbI3 | 4.965 mW  (Vis) | 1.7 | 0.227 s | 60 | 72.46  kPa |
| hybrid | 2022 | CsPbI3-PVDF | 10 mW  (UV) | 3.0 × 10-4 | 2.4 s | 61 | 2.2%  strain |
| hybrid | 2022 | Cs2SnI6-PVDF | 100 mW  (UV) | 3.0 × 10-4 | / | 62 | 1%  strain |
| inorganic | 2015 | Black phosphorus | 1.35 mW  (NIR) | 7.2 × 10-3 | 40 μs | 63 |  |
| inorganic | 2018 | GaAs/AlGaAs | 78 mW  (IR) | 0.20 | / | 64 |  |
| inorganic | 2015 | Black phosphorus | 1.91 mW  (NIR) | 0.66 | / | 65 |  |
| inorganic | 2018 | Si/CdS | 1.1 mW  (UV-NIR) | 5.9 × 10-3 | 492 μs | 66 |  |
| inorganic | 2018 | rGO/CdS NA | 1.33 mW  (UV-NIR) | 5.8 × 10-4 | 1.7 ms | 67 | -0.4%  strain |
| organic | 2020 | COi8DFIC/MAPbBr3 | 100 mW  (Vis-NIR) | 0.16 | 0.1 μs | 68 |  |
| organic | 2012 | CuPC/H2TPyP NA | 5.51 mW  (Daylight) | 1.2 × 10-8 | / | 69 |  |
| organic | 2012 | CuPc/C60 | 100 mW  (Vis) | 0.044 | / | 70 |  |
| hybrid | 2020 | Fe3(THT)2(NH4)3 | 5.6 mW  (Vis-NIR) | 4.0 × 10-3 | 2.3 s | 71 |  |
| inorganic | 2009 | Graphene | 3 mW  (NIR) | 5.0 × 10-4 | / | 72 |  |
| inorganic | 2012 | Graphene/PbSe/TiO2 | 100 mW  (Daylight) | 0.51 | / | 73 |  |
| organic | 2023 | QC-based coupling compound | 4 mW (NIR) | 0.067 | / | 74 |  |
| organic | 2023 | PM6:Y6/FAMAPbI3/PFN-Br | 2.4 mW  (NIR) | 1.5 | 5.6μs | 75 |  |
| organic | 2024 | P3HT/  EH-IDTBR | 4mW  (Vis) | 0.083 | / | 76 |  |
| inorganic | 2025 | Graphene/  PtSe2/Si | 100mW  (Vis-IR) | 0.02 | 48μs | 78 |  |
|  | 2024 | CuPC/GO | 10 mW  (UV −NIR) | 5.8 | 30 μs | **This work** |  |

**List of abbreviations:**

In the column of “Notes”, 1 kgf = 9.8 N.

QD = quantum dot; NA = nanowires array/nanorods array; GO = graphene oxide; rGO = reduced graphene oxide;

PVK = poly(9-vinylcarbazole)

TFT-CN = furan-thiophene quinoidal compound;

DPP-DTT = poly(N-alkyl diketopyrrolo-pyrrole dithienylthieno[3,2-b]thiophene);

PDPP2T-TT-OD = poly[2,5-(2-octyldodecyl)-3,6-diketop yrrolopyrrole-alt-5,5-(2,5-di(thien-2-yl)thieno [3,2-b]thiophene)];

PC70BM = (6,6)-phenyl-C70 butyric acid methyl ester;

DTT = 2-ethynyl-5-hexyldithieno[3,2-b:2’,3’-d]thiophene;

DPA = diphenylanthracene;

ABT = anthra[2,3-b]benzo[d]thiophene;

QC = 2-[4-oxonaphthalen-1(4H)-ylidene]malononitrile;

PTAA = poly[(bis(4-phenyl)(2,4,6,triMethylphenyl)aMine];

DRCN5T = 2,2'[(3,3''',3'''',4'-tetraoctyl[2,2':5',2'':5'',2''':5''',2''''-quinquethiophene]-5,5''''-diyl)bis[(Z)methylidyne(3-ethyl-4-oxo-5,2-thiazolidinediylidene)]]bis-propanedinitrile;

(PCE10):BTPV-4F-eC9 = poly([2,6′-4,8-di(5-ethylhexylthienyl)benzo[1,2-b;3,3-b]dithiophene]{3-fluoro-2[(2-ethylhexyl)carbonyl]thieno[3,4-b]thiophenediyl};

PDDTT = poly(5,7-bis(4-decanyl-2-thienyl)-thieno (3,4-b)diathiazole-thiophene-2,5);

PC60BM = (6,6)-phenyl-C60-butyric acid methyl ester;

DNTT = dinaphtho[2,3-b:2′,3′-f]thieno[3,2-b]thiophen;

PC71BM = (6,6)-phenyl C71 butyric acid methyl ester;

P3HT = Poly(3-hexylthiophene-2,5-diyl);

EH-IDTBR = 5,5’-[[4,4,9,9-Tetrakis(2-ethylhexyl)-4,9-dihydro-s-indaceno[1,2-b:5,6-b’]dithiophene-2,7-diyl]bis(2,1,3-benzothiadiazole-7,4-diylmethylidyne)]bis[3-ethyl-2-thioxo-4-thiazolidinone


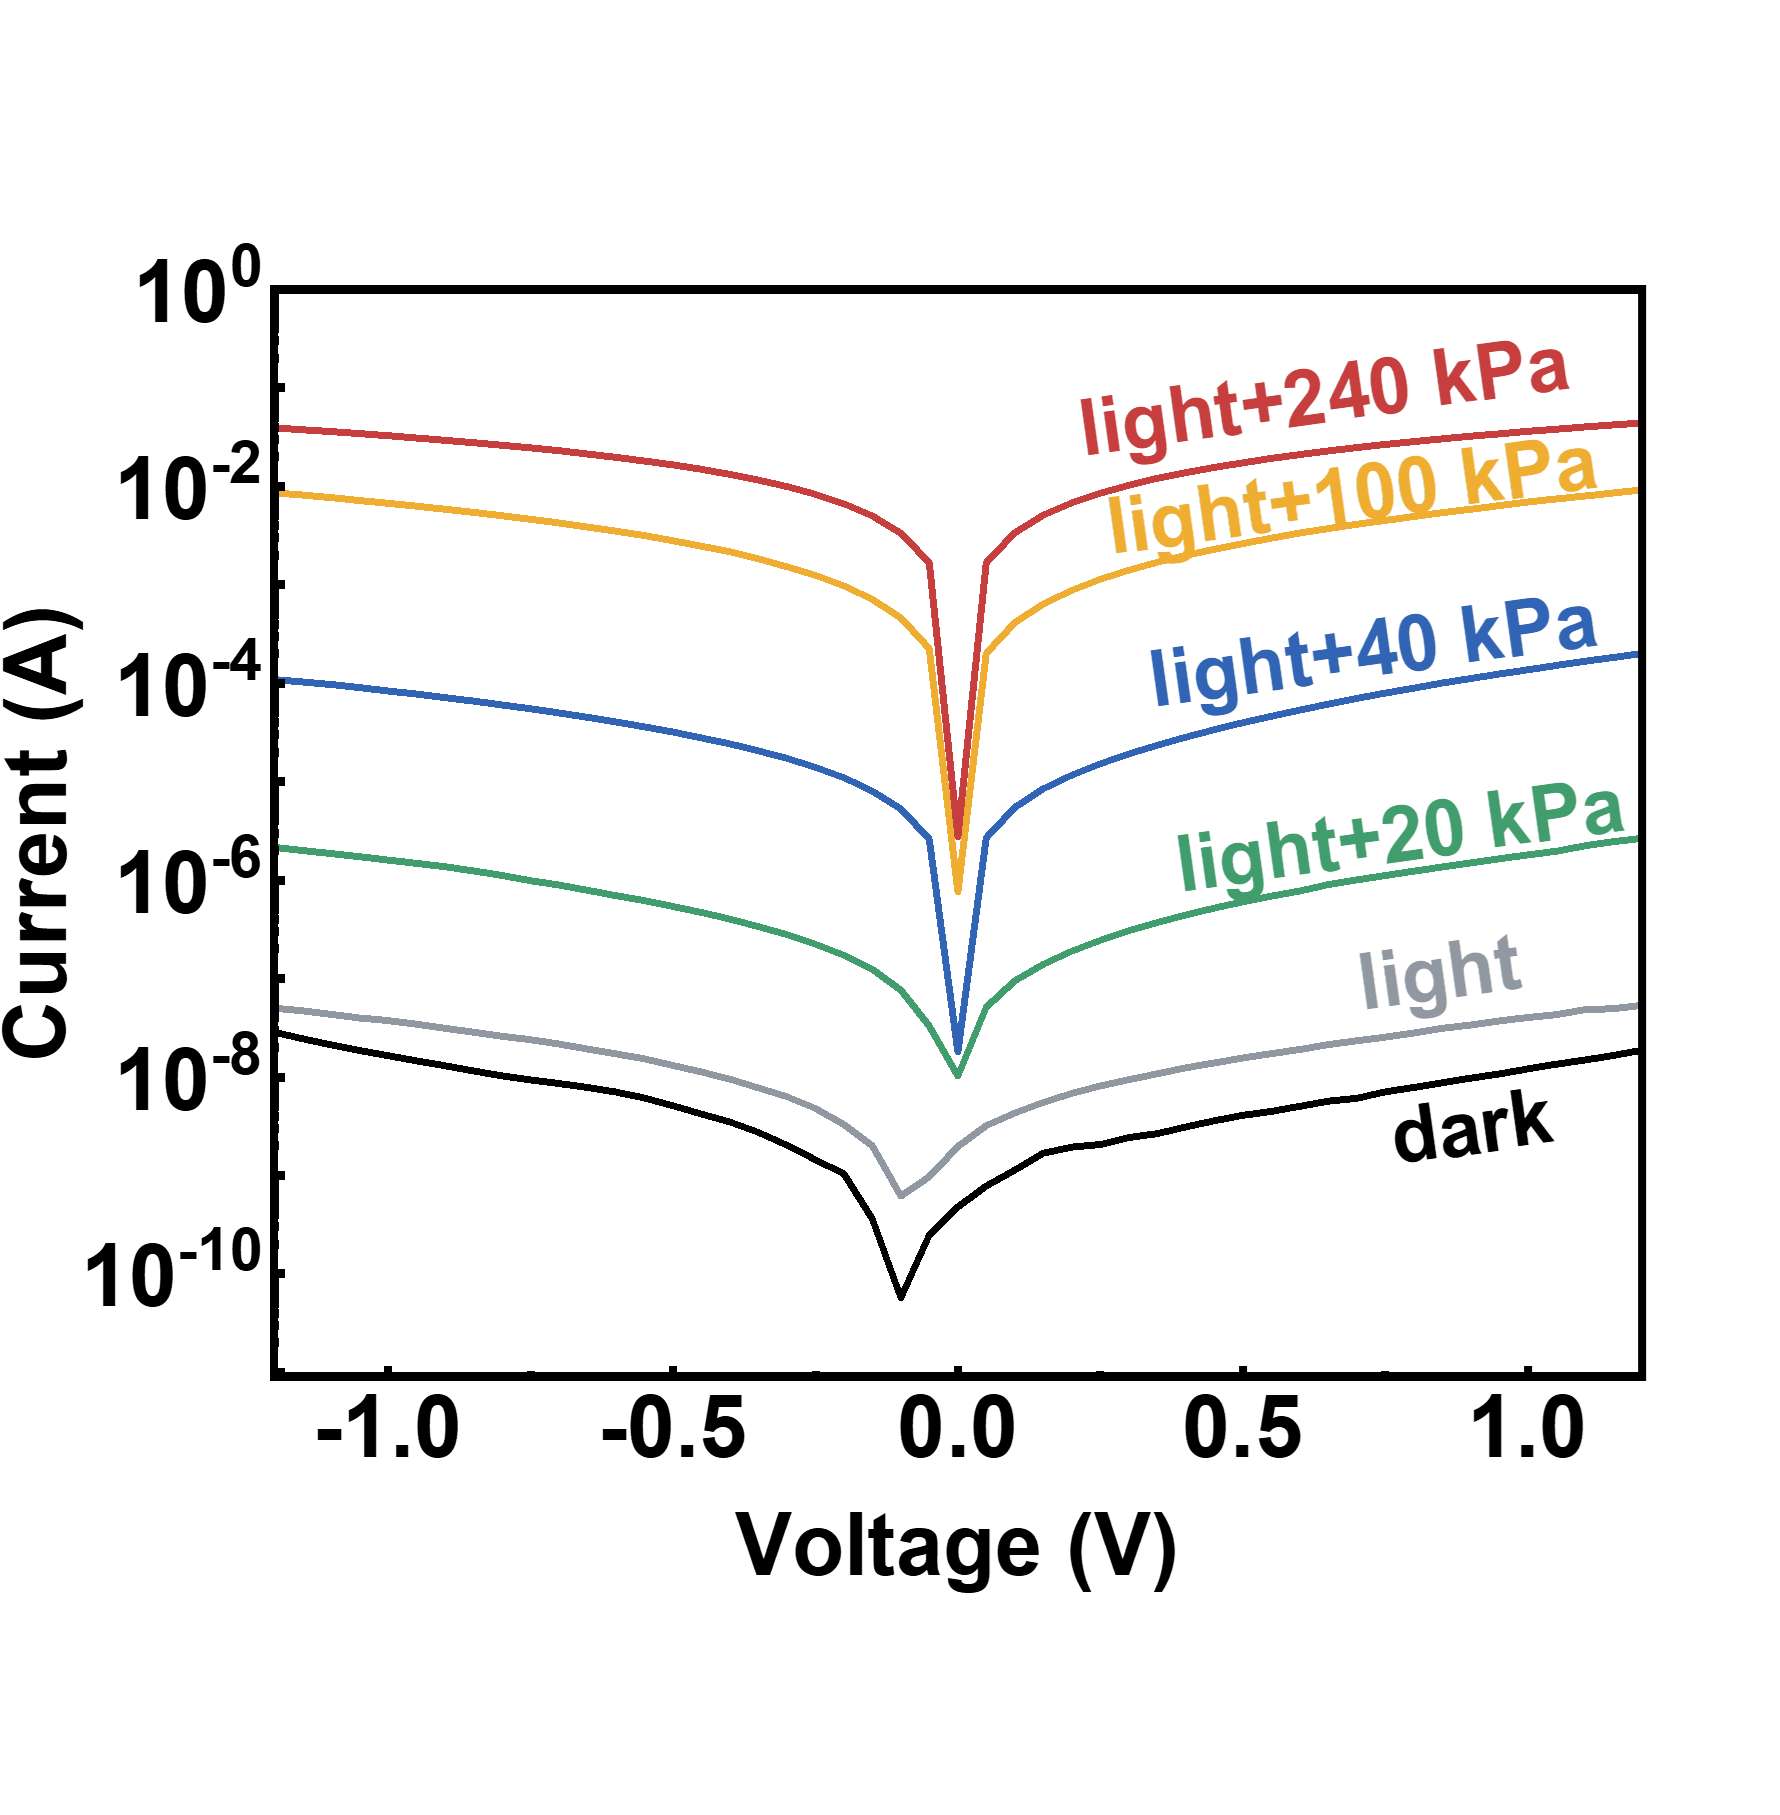


**Supplementary Fig. 1 | Photocurrent at various pressures of 0, 20, 40, 100, and 240 kPa, respectively, under visible-light of 635 nm illumination**. Incident power *E*in = 3 nW.


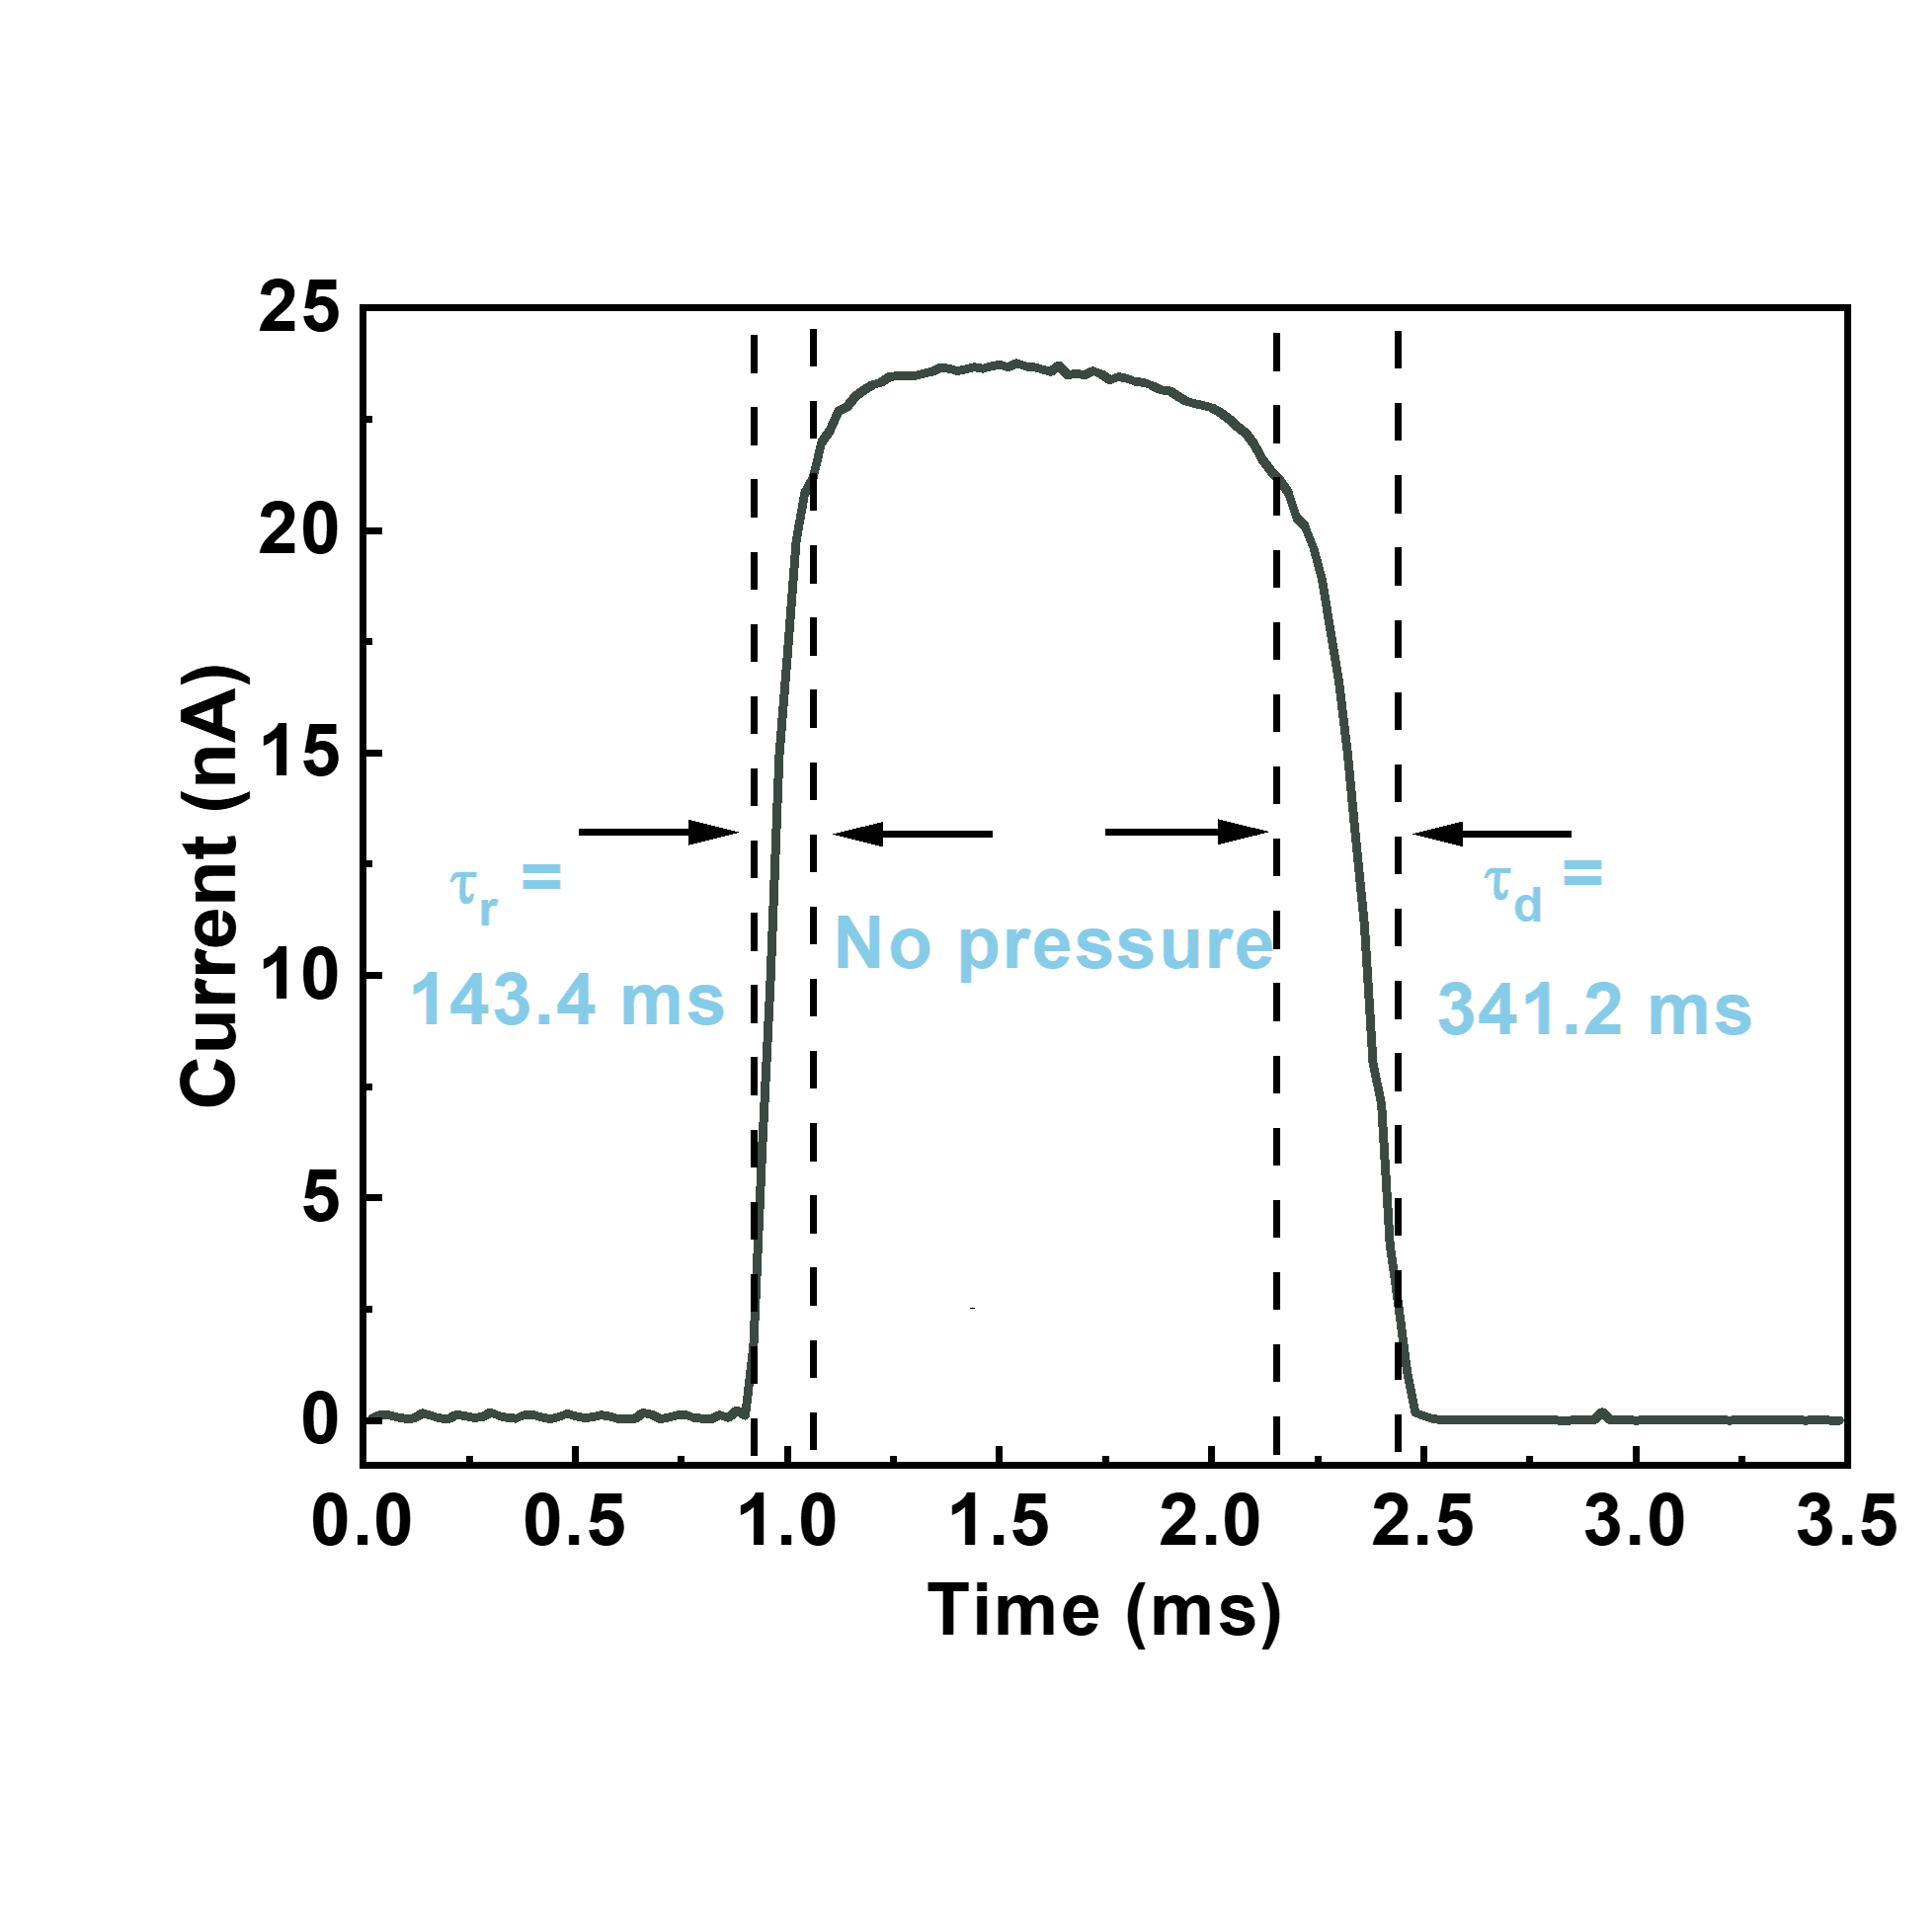


**Supplementary Fig. 2 |** **Rise (*τ*r) and decay (*τ*d) times of the photodetector** **without external pressure.** The incident light has a wavelength of 635 nm and a power of 3 nW.


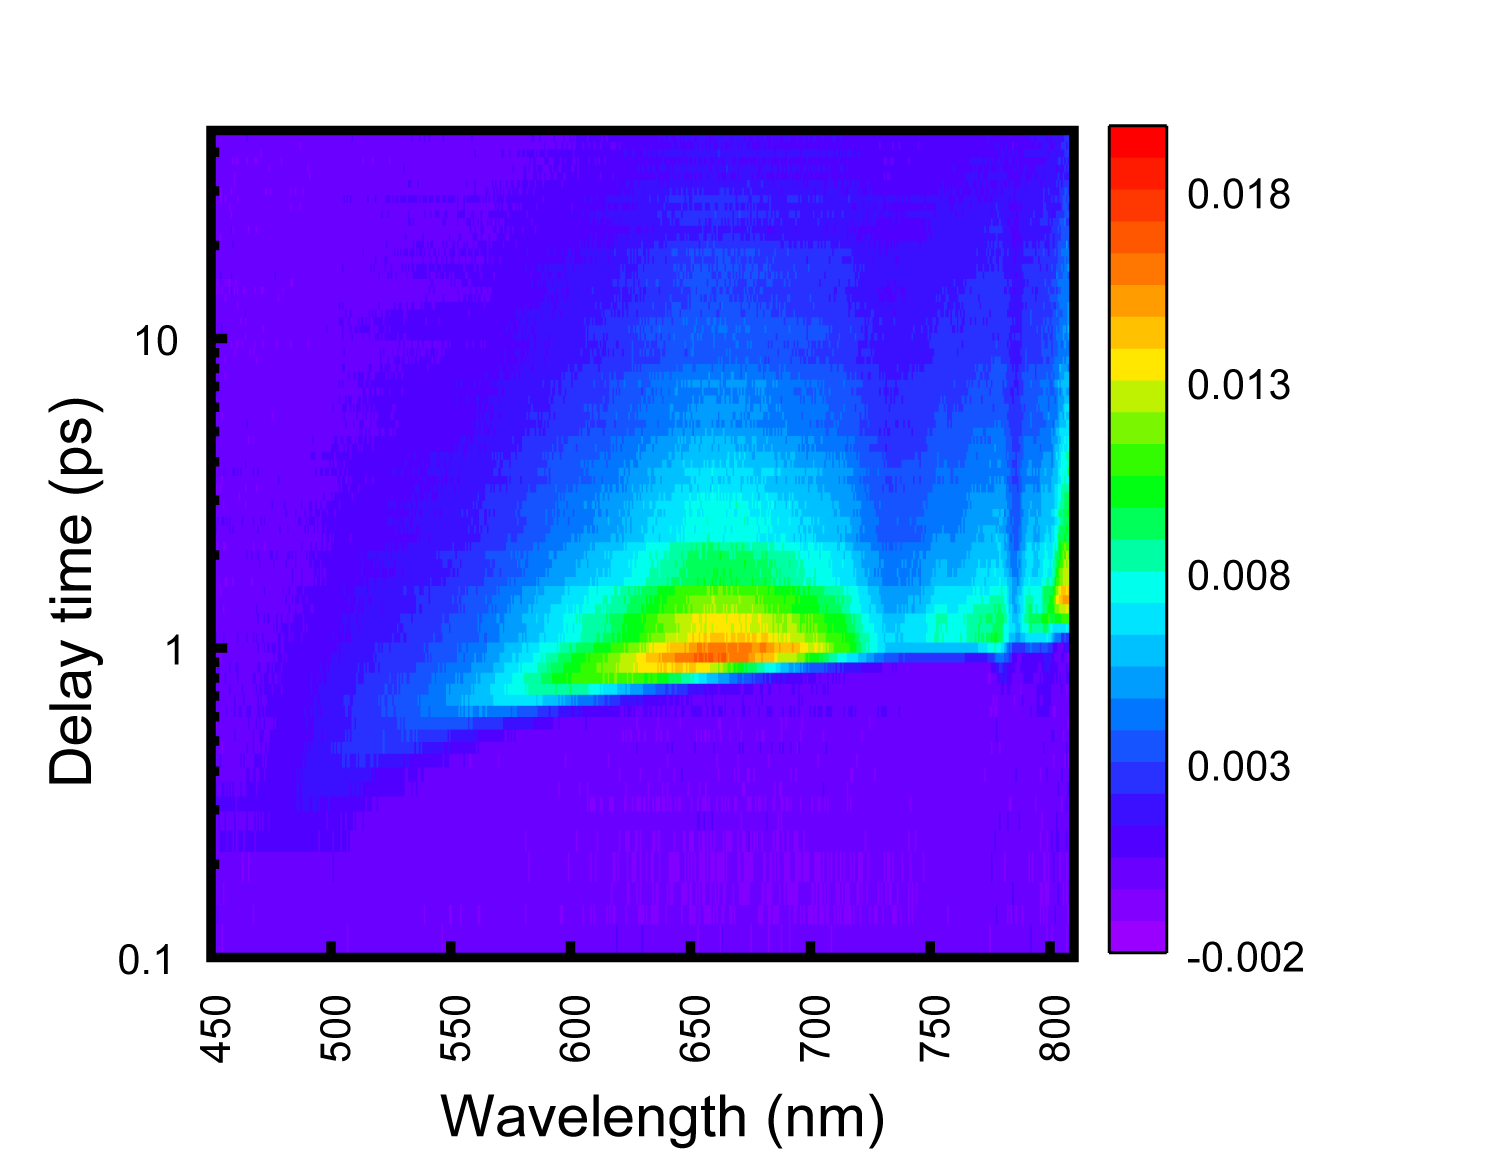


**Supplementary** **Fig. 3 | Transient absorption (TA) spectra of the unoptimized CuPC@GO membrane**. The laser pump is at a wavelength of 400 nm.


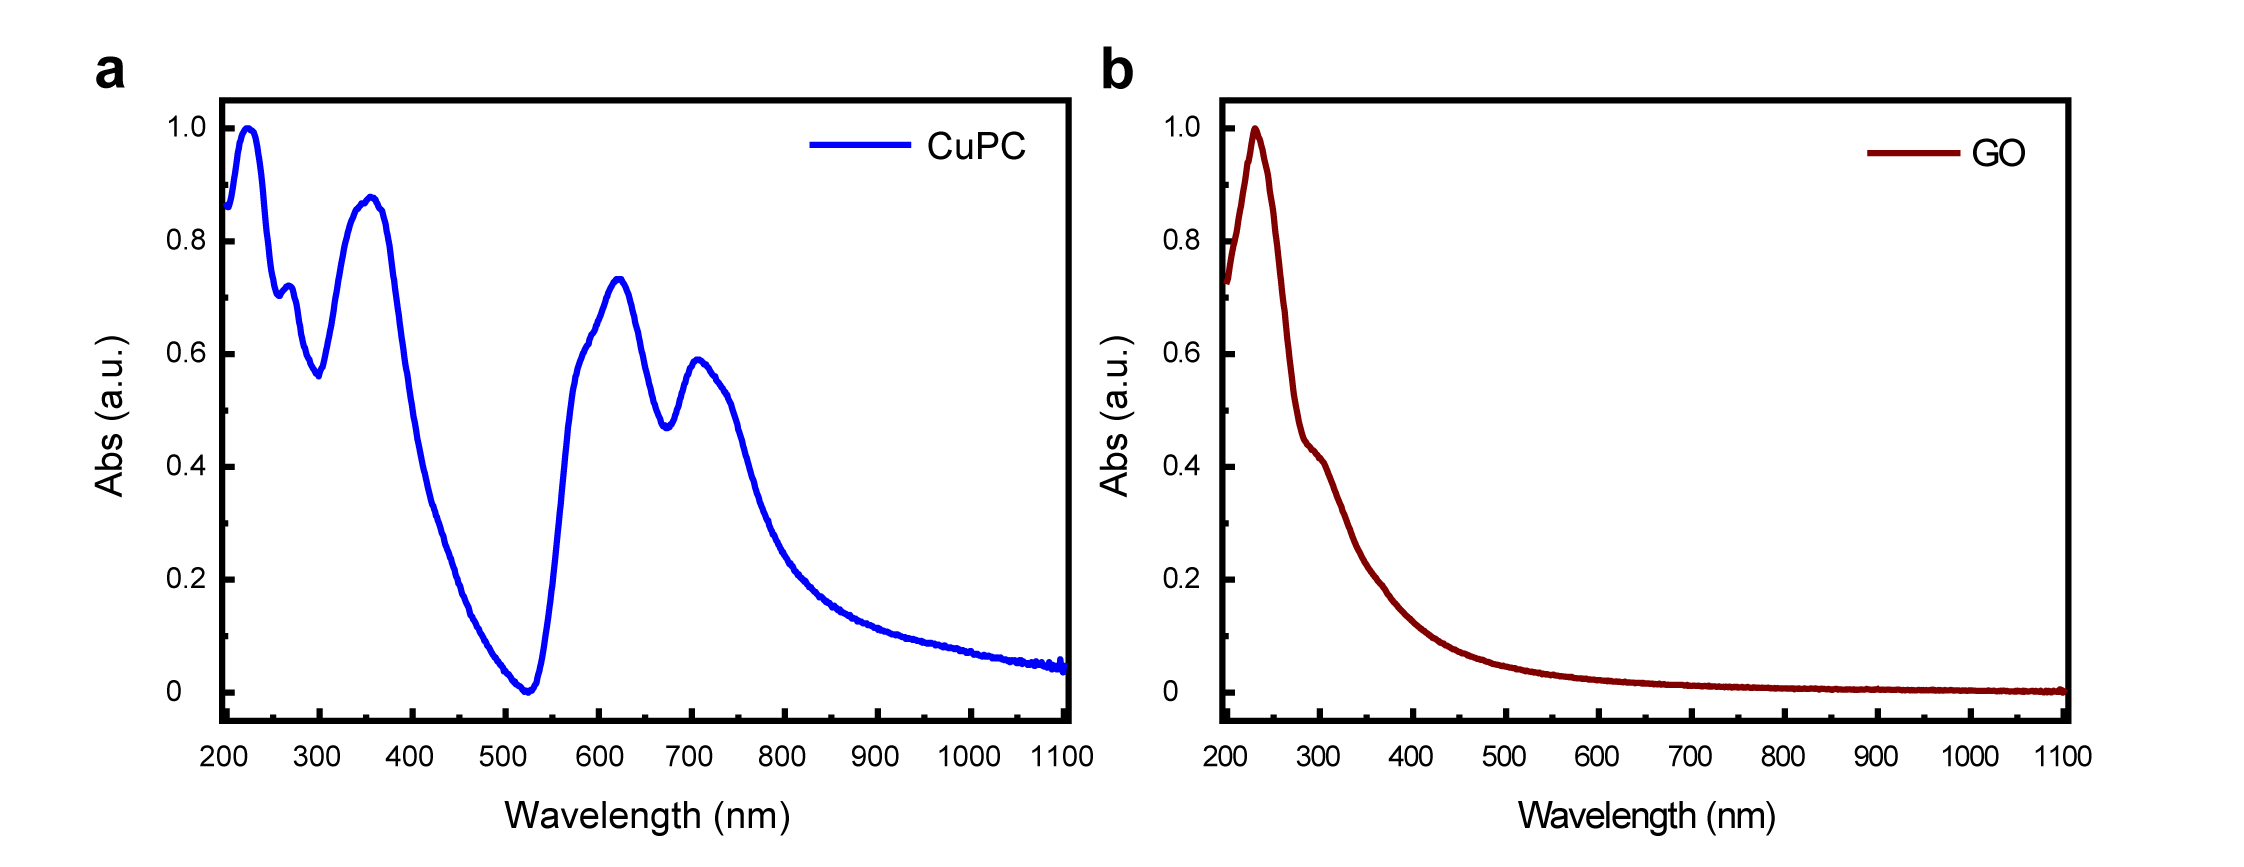


**Supplementary Fig. 4 | Ultraviolet-visible spectroscopy (UV-vis) results of the aqueous solutions of CuPC (a) and GO (b).** The test wavelengths are 200-1100 nm.


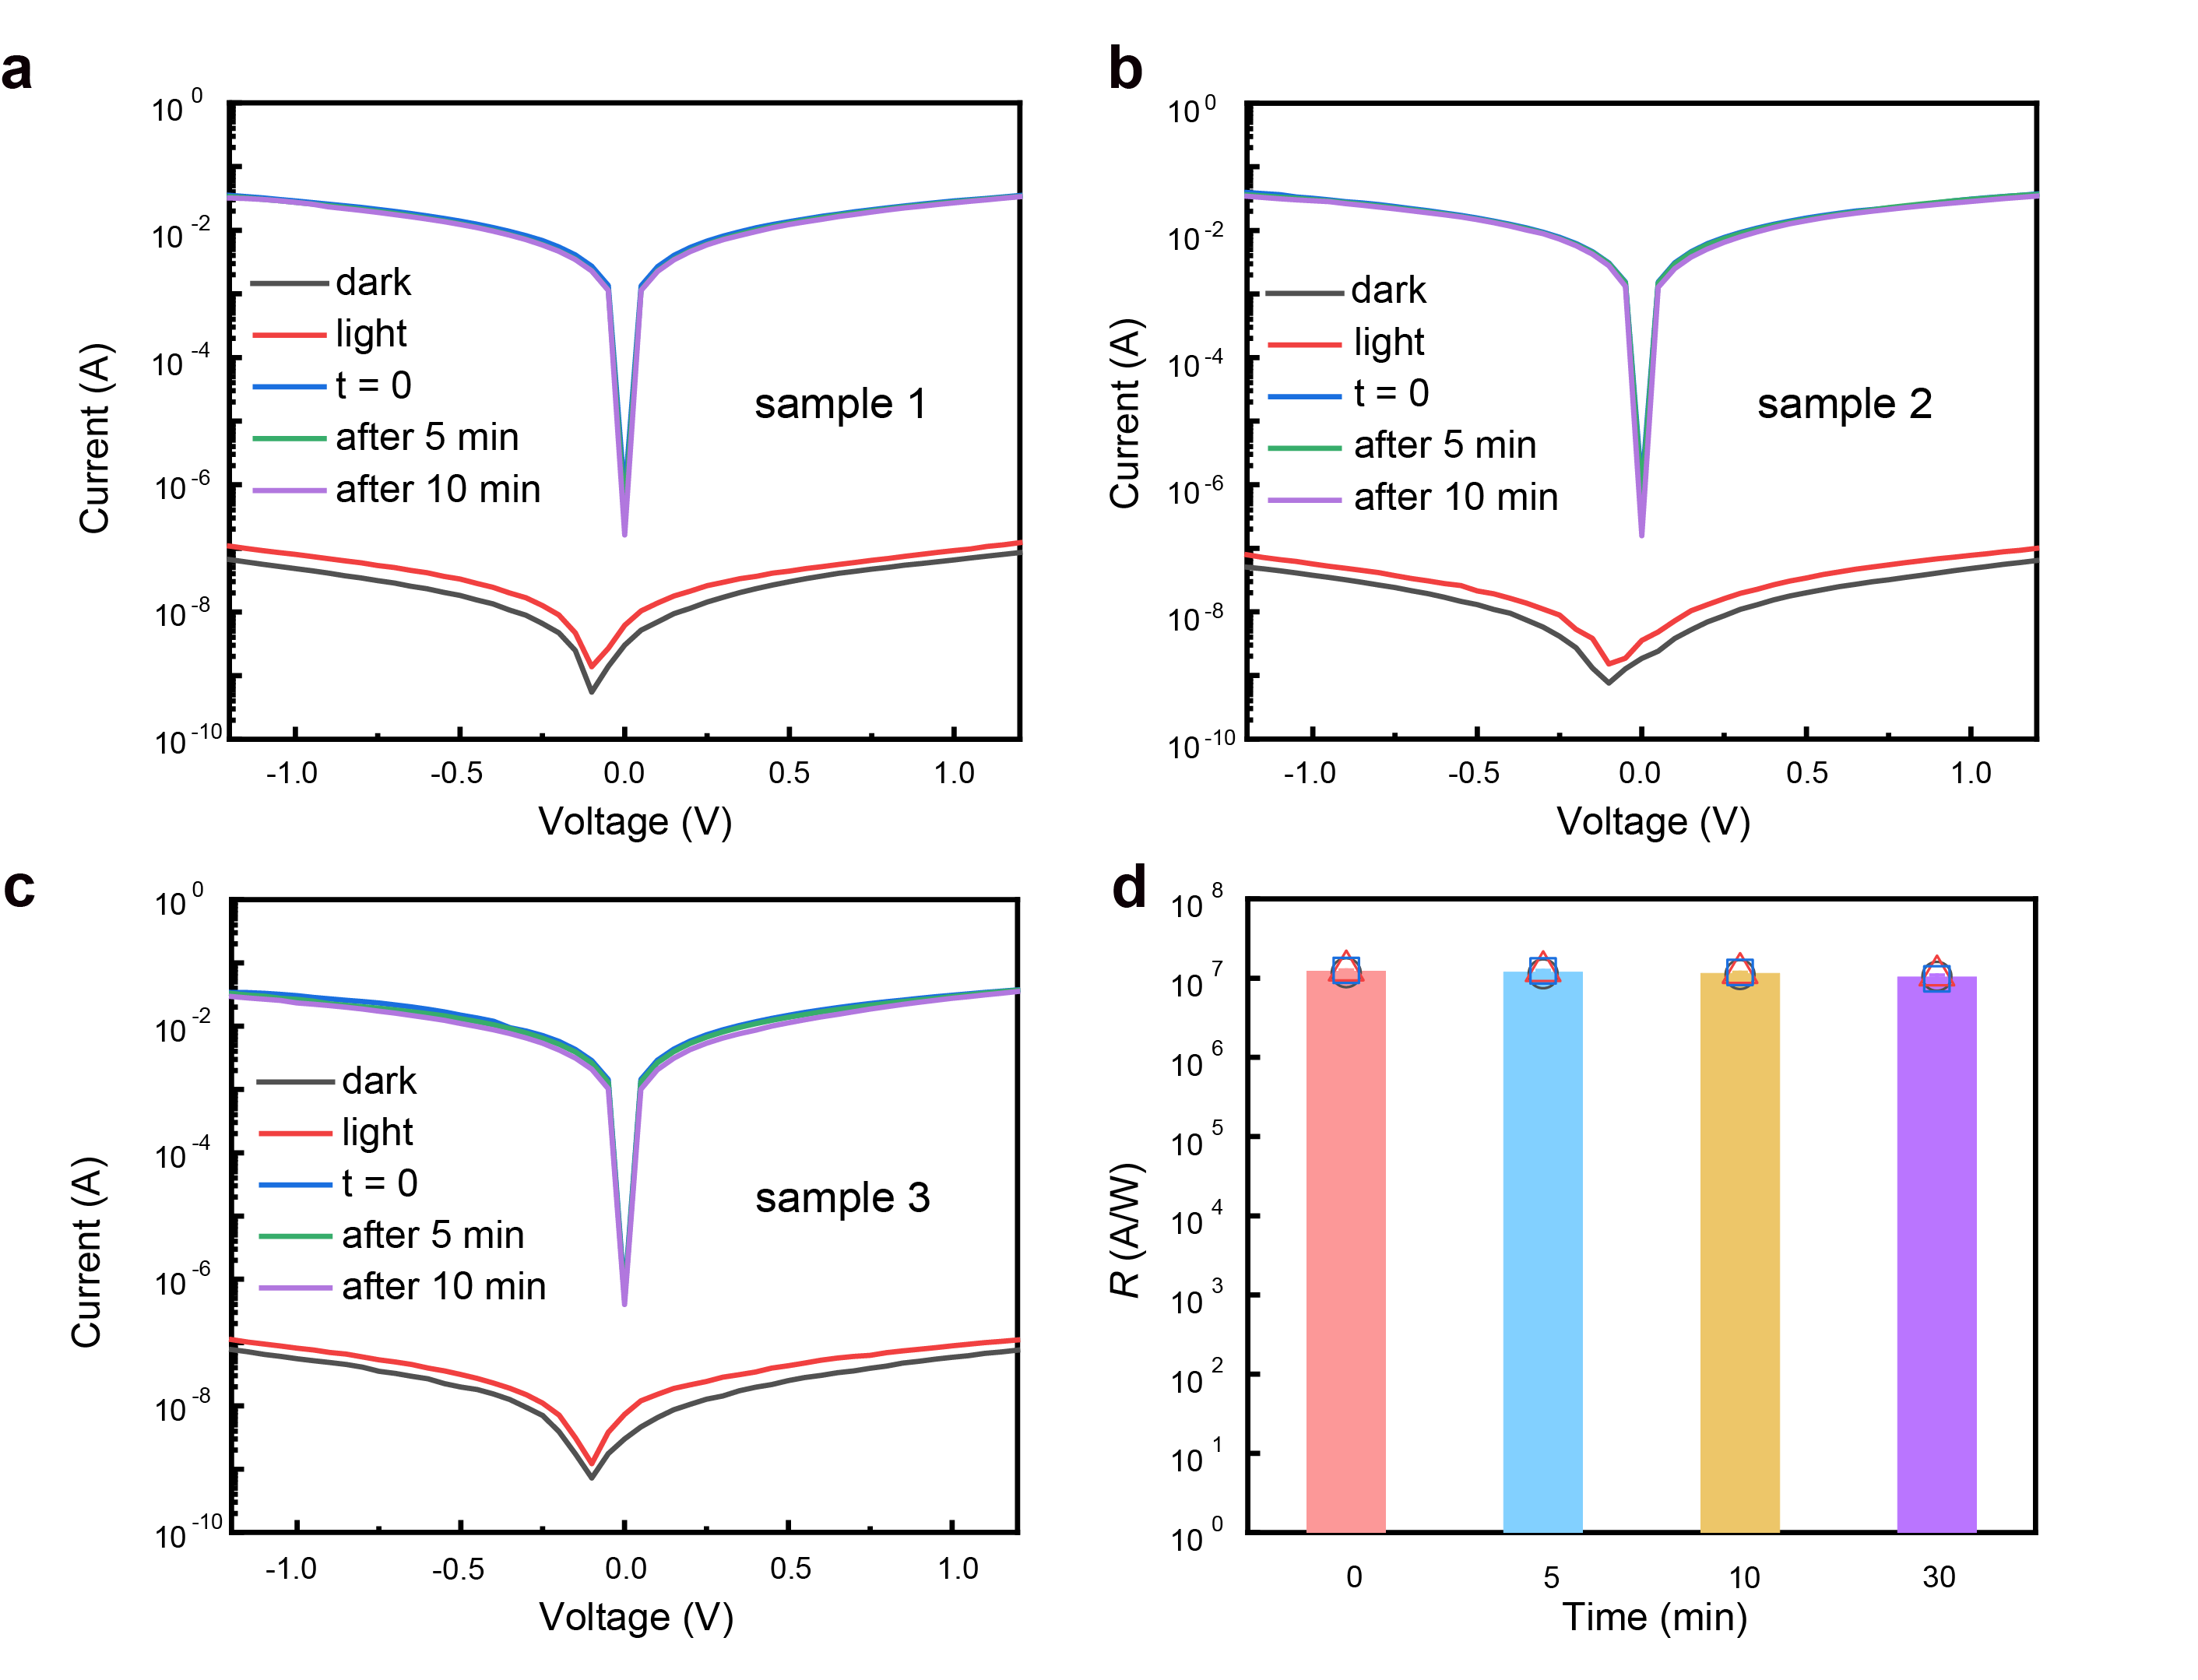


**Supplementary Fig. 5 | Performances for** **the CuPC@GO photodetector in a small package at different time spots.** (a-c) Photocurrent‒voltage performances for the three samples, respectively. The term “*t* = 0” in the legend corresponds to the case that the photodetector is just encapsulated into a small package. (d) Time evolution of the responsivity (*R*) for the three photodetector samples. Columns indicate the average values of three samples at given time spots; the square, triangle, and circle symbols represent the *R*-values obtained from samples 1, 2, and 3, respectively. The incident light has a wavelength of 635 nm and a power of 3 nW.


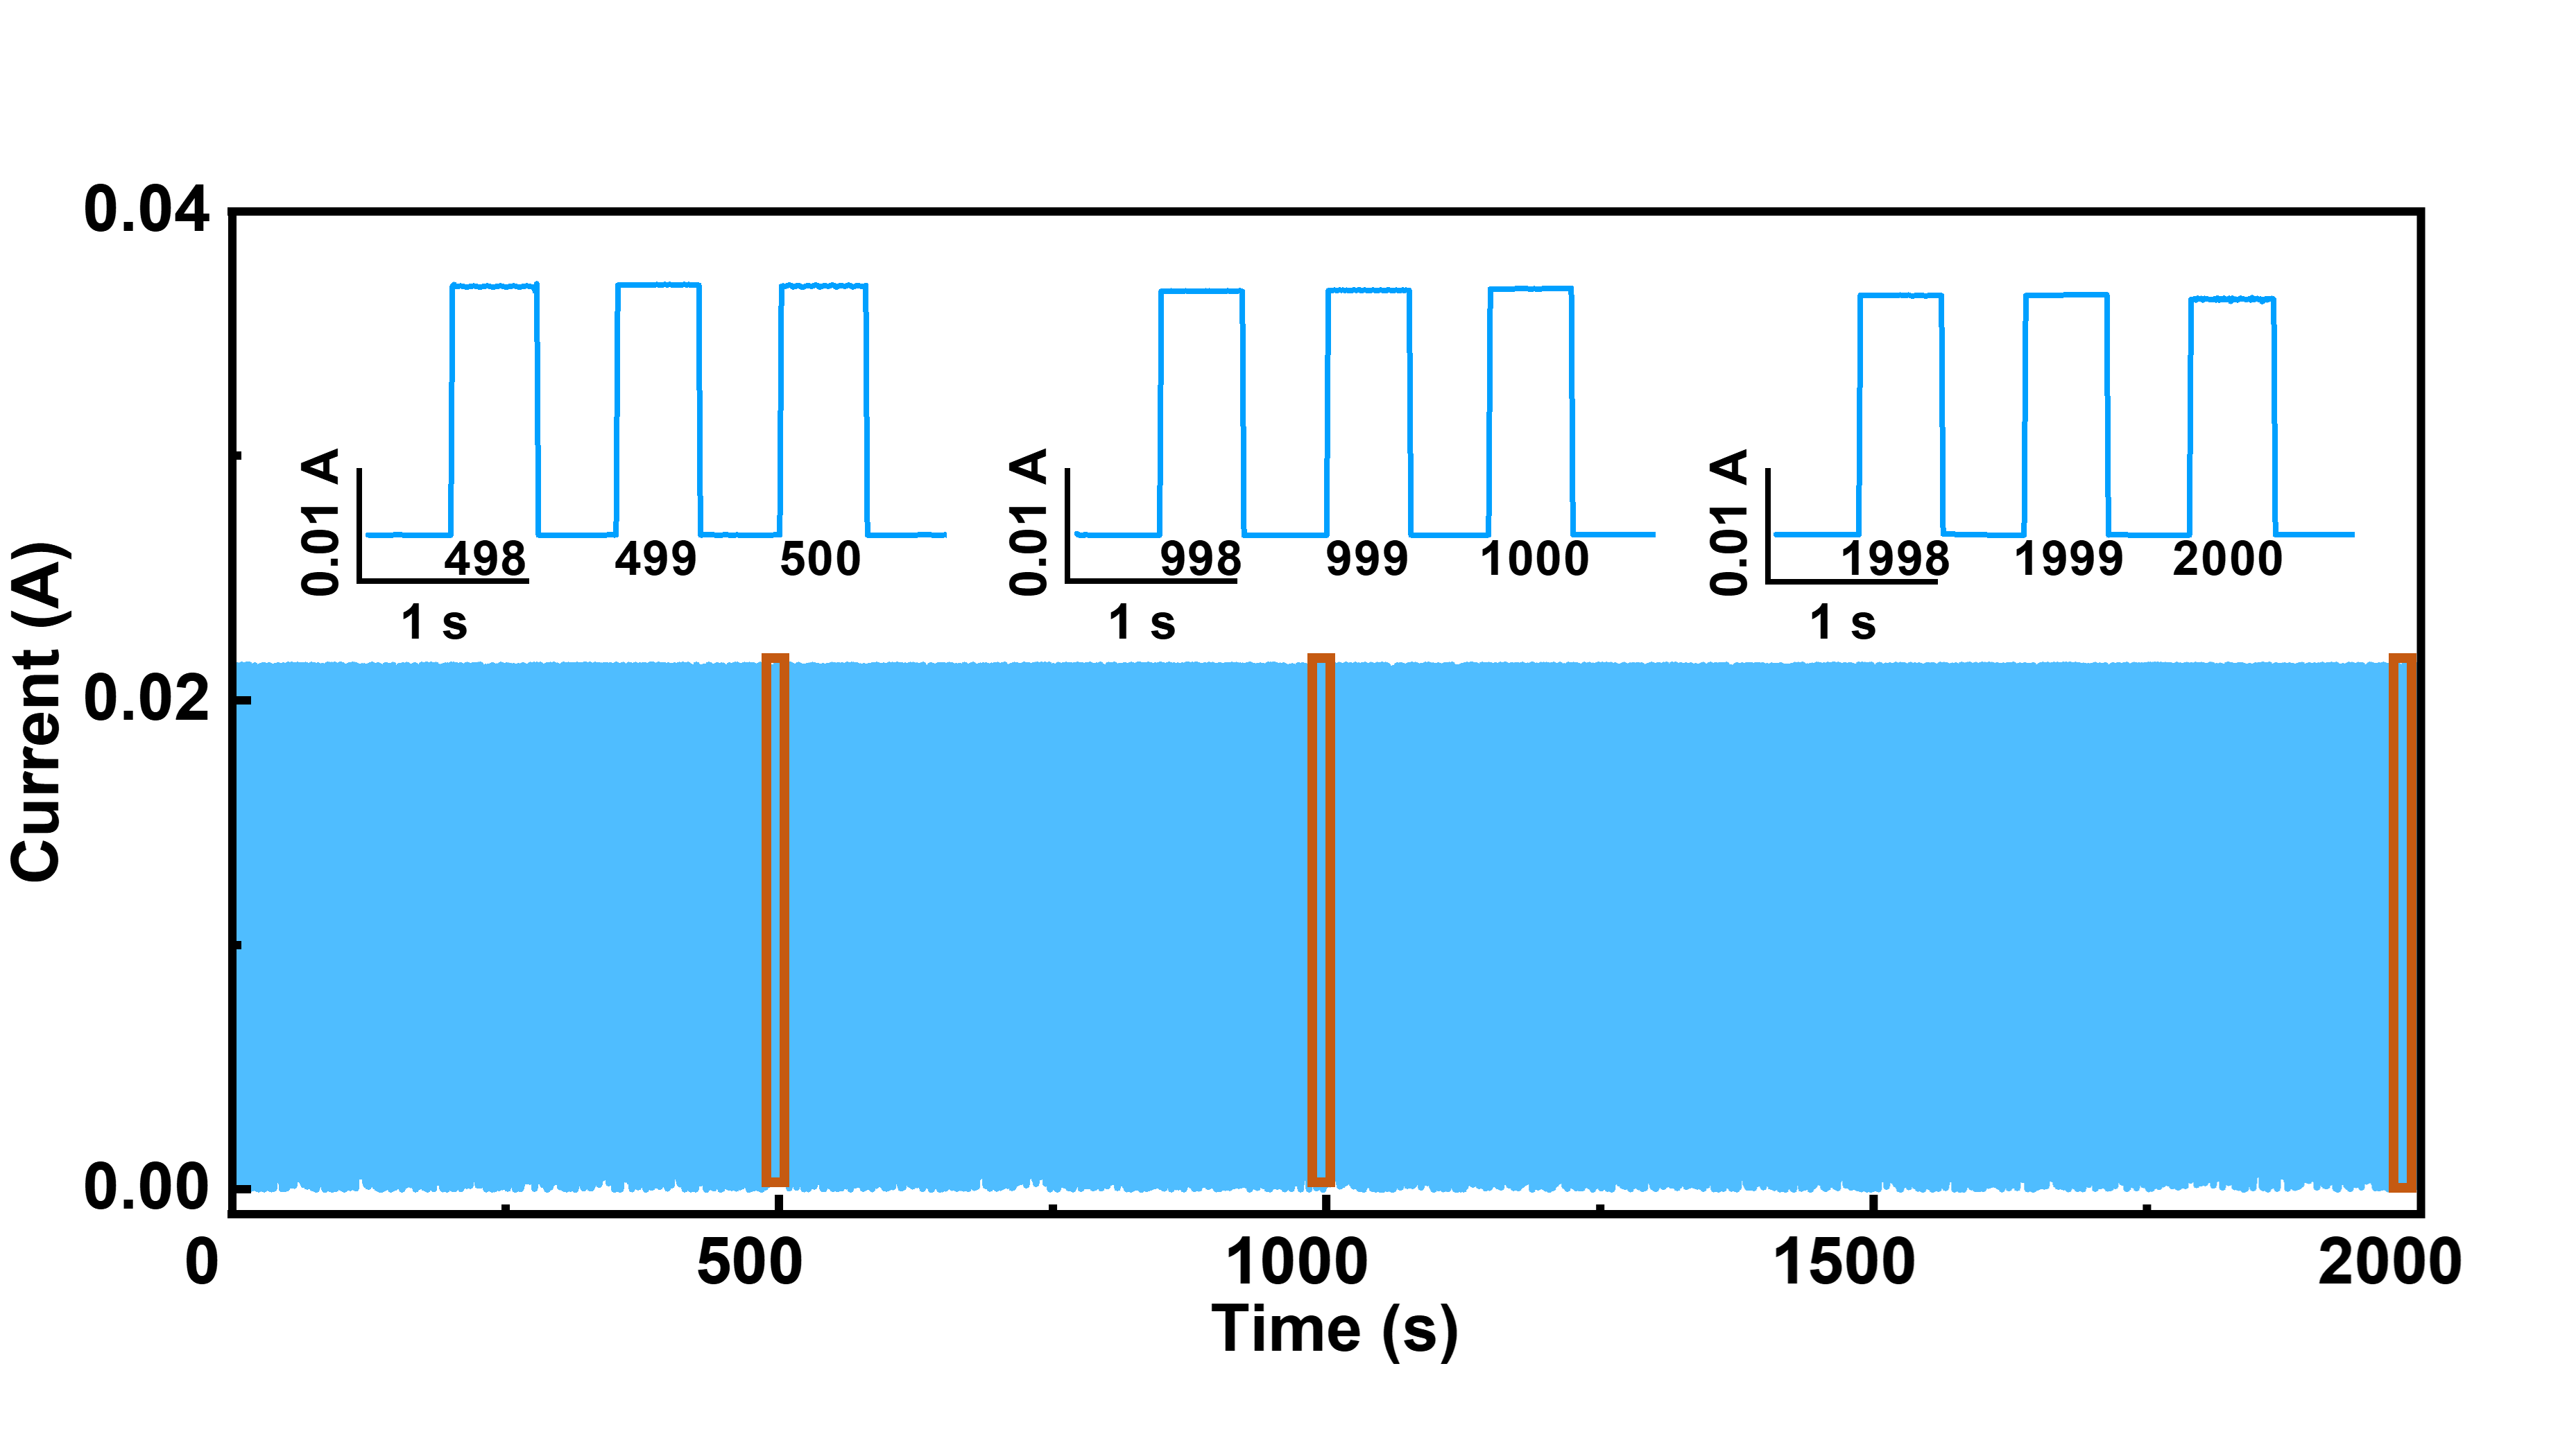


**Supplementary Fig. 6 | Stability of** **the CuPC@GO photodetector.** Long-term cyclic stability of the photodetector. The brown squares indicate the magnified areas around 500 s, 1000 s, and 2000 s, respectively. Insets are enlarged plots corresponding to the three regions enclosed by the brown square. The peak voltage decreases by less than 3% over 2000 cycles.

**CuPC@GO-based** **photodetector array for ultrasensitive imaging**

As a proof-of-concept to demonstrate the capabilities of the CuPC@GO photodetector as a vision sensor at the chip scale, a 3 × 3 imaging array (*N* = 9) of the photodetectors with a pixel diameter of 1 mm was fabricated (Supplementary Fig. 7a,b). Explicitly, at pressure ~ 240 kPa, the CuPC@GO membrane can obtain the ultrahigh photoresponsivity. Then the CuPC@GO membrane was stabilized by the packaging process to keep the photoresponsivity for long-term usage. The pixels in the array also achieved a high responsivity with *R*-values more than 106 A/W (Supplementary Fig. 7c).

Image patterns of the letters including “X” and “U” were projected on the array. The input light irradiation is ~ 3 nW for each pixel. The currents of each photodetector were measured and reconstructed into an image, in which the gray level of each pixel corresponds to the log value of the current (Supplementary Fig. 7d). As a result, significant current enhancement is achieved on the irradiated pixels, and the reconstructed images are consistent with the projected patterns. The maximal current enhancement obtained is ~ 0.5 mA. This prototype of vision sensor indicates that the CuPC@GO photodetector is easily scalable and provides various possibilities for ultrasensitive imaging systems.


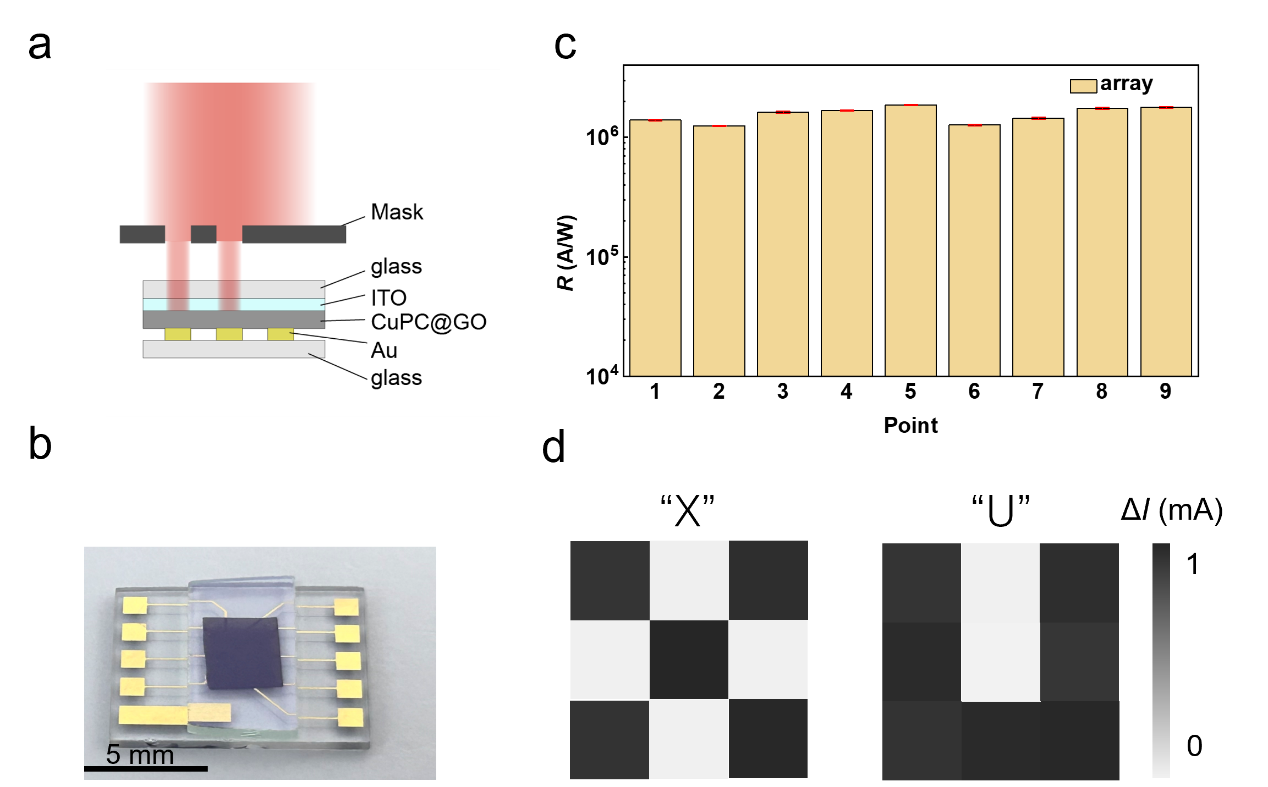


**Supplementary Fig. 7 | CuPC@GO-based photodetector array for ultrasensitive imaging.** (a) Schematic of the photodetector array for imaging. (b) Photography of the 3 × 3 imaging array based on the CuPC@GO photodetector. (c) Responsivity of each pixel on the array. Data are presented as the mean value with standard deviation taken from three independent experiments. (d) Reconstructed images for projected letters of “X” and “U” on the photodetector array. The gray level of each pixel corresponds to the log value of the current.

**References**

1. Tamalampudi, S. R. *et al*. High Performance and Bendable Few-Layered InSe Photodetectors with Broad Spectral Response. *Nano Lett.* **14**, 2800–2806 (2014).
2. Lv, T. *et al*. High-Responsivity Multiband and Polarization-Sensitive Photodetector Based on the TiS3/MoS2 Heterojunction. *ACS Appl. Mater. Interfaces* **14**, 48812–48820 (2022).
3. Ji, D. *et al*. Band-like transport in small-molecule thin films toward high mobility and ultrahigh detectivity phototransistor arrays. *Nat. Commun.* **10**, 12 (2019).
4. Wang, C. *et al*. N-Type 2D Organic Single Crystals for High-Performance Organic Field-Effect Transistors and Near-Infrared Phototransistors. *Advanced Materials* **30**, 1706260 (2018).
5. Li, S. *et al*. Two-dimensional perovskite oxide as a photoactive high-κ gate dielectric. *Nat. Electron.* **7**, 216–224 (2024).
6. Liu, C.-H. *et al*. Graphene photodetectors with ultra-broadband and high responsivity at room temperature. *Nat. Nanotech.* **9**, 273–278 (2014).
7. Xu, H. *et al*. A high-sensitivity near-infrared phototransistor based on an organic bulk heterojunction. *Nanoscale* **5**, 11850–11855 (2013).
8. Qian, C. *et al*. High-Performance Organic Heterojunction Phototransistors Based on Highly Ordered Copper Phthalocyanine/para-Sexiphenyl Thin Films. *Advanced Functional Materials* **27**, 1604933 (2017).
9. Zhang, F. et al. Piezo-phototronic Effect Enhanced Visible/UV Photodetector of a Carbon-Fiber/ZnO-CdS Double-Shell Microwire. ACS Nano **7**, 4537–4544 (2013).
10. Wang, Z. *et al*. Piezo-Phototronic UV/Visible Photosensing with Optical-Fiber–Nanowire Hybridized Structures. *Advanced Materials* **27**, 1553–1560 (2015)
11. Song, J.-K. *et al*. Stretchable colour-sensitive quantum dot nanocomposites for shape-tunable multiplexed phototransistor arrays. *Nat. Nanotechnol.* **17**, 849–856 (2022).
12. Javadi, M. *et al*. Realization of a Piezophototronic Device Based on Reduced Graphene Oxide/MoS2 Heterostructure. *IEEE Electron Device Lett.* **37**, 677–680 (2016).
13. Wang, L. *et al*. A Chiral Reduced-Dimension Perovskite for an Efficient Flexible Circularly Polarized Light Photodetector. *Angewandte Chemie* **132**, 6504–6512 (2020).
14. Hu, W. *et al*. High-Performance Flexible Photodetectors based on High-Quality Perovskite Thin Films by a Vapor–Solution Method. *Advanced Materials* **29**, 1703256 (2017).
15. Wang, X. *et al*. High-responsivity graphene/silicon-heterostructure waveguide photodetectors. *Nat. Photon.* **7**, 888–891 (2013).
16. Liu, W. *et al*. Graphene charge-injection photodetectors. *Nat. Electron.* **5**, 281–288 (2022).
17. Jiang, H. *et al*. Synergistic-potential engineering enables high-efficiency graphene photodetectors for near- to mid-infrared light. *Nat. Commun.* 15, 1225 (2024).
18. Chen, M. *et al*. Piezo-Phototronic Effect Modulated Deep UV Photodetector Based on ZnO-Ga2O3 Heterojuction Microwire. *Advanced Functional Materials* **28**, 1706379 (2018).
19. Chen, Y. *et al*. High-Performance Inorganic Perovskite Quantum Dot–Organic Semiconductor Hybrid Phototransistors. *Advanced Materials* **29**, 1704062 (2017).
20. Li, L. *et al*. Few-Layered PtS2 Phototransistor on h-BN with High Gain. *Advanced Functional Materials* **27**, 1701011 (2017).
21. Gong, F. *et al*. High-Sensitivity Floating-Gate Phototransistors Based on WS2 and MoS2. *Advanced Functional Materials* **26**, 6084–6090 (2016).
22. Guo, F. *et al*. A nanocomposite ultraviolet photodetector based on interfacial trap-controlled charge injection. *Nat. Nanotech.* **7**, 798–802 (2012).
23. Zhang, X. *et al*. Enhanced Performances of PVK/ZnO Nanorods/Graphene Heterostructure UV Photodetector via Piezo-Phototronic Interface Engineering. *Advanced Materials Interfaces* **6**, 1901365 (2019).
24. Fuentes-Hernandez, C. *et al*. Large-area low-noise flexible organic photodiodes for detecting faint visible light. *Science* **370**, 698–701 (2020).
25. Lan, Z. *et al*. Near-infrared and visible light dual-mode organic photodetectors. *Science Advances* **6**, eaaw8065 (2020).
26. Kim, K. H. *et al*. Highly Photosensitive J-Aggregated Single-Crystalline Organic Transistors. *Advanced Materials* **23**, 3095–3099 (2011).
27. Cao, F., *et al*. Gradient Energy Band Driven High-Performance Self-Powered Perovskite/CdS Photodetector. *Advanced Materials* **31**, 1806725 (2019).
28. Park, S. H. *et al*. 3D Printed Polymer Photodetectors. *Advanced Materials* **30**, 1803980 (2018).
29. Sarker, B. K. *et al*. Position-dependent and millimetre-range photodetection in phototransistors with micrometre-scale graphene on SiC. *Nat. Nanotech.* **12**, 668–674 (2017).
30. Du, S. *et al*. A Broadband Fluorographene Photodetector. *Advanced Materials* **29**, 1700463 (2017).
31. Tan, H. *et al*. Lateral Graphene-Contacted Vertically Stacked WS2/MoS2 Hybrid Photodetectors with Large Gain. *Advanced Materials* **29**, 1702917 (2017).
32. Baugher, B. W. H., Churchill, H. O. H., Yang, Y. & Jarillo-Herrero, P. Optoelectronic devices based on electrically tunable p–n diodes in a monolayer dichalcogenide. *Nat. Nanotech.* **9**, 262–267 (2014).
33. Gan, X. *et al*. Chip-integrated ultrafast graphene photodetector with high responsivity. *Nat. Photon*. **7**, 883–887 (2013).
34. Luo, J. *et al*. Photocurrent Enhanced in UV-vis-NIR Photodetector Based on CdSe/CdTe Core/Shell Nanowire Arrays by Piezo-Phototronic Effect. *ACS Photonics* **7**, 1461–1467 (2020)
35. Shen, K. *et al*. Flexible and Self-Powered Photodetector Arrays Based on All-Inorganic CsPbBr3 Quantum Dots. *Advanced Materials* **32**, 2000004 (2020).
36. Maiti, R. *et al*. Strain-engineered high-responsivity MoTe2 photodetector for silicon photonic integrated circuits. *Nat. Photonics* **14**, 578–584 (2020).
37. Bie, Y.-Q. *et al*. A MoTe2-based light-emitting diode and photodetector for silicon photonic integrated circuits. *Nat. Nanotech.* **12**, 1124–1129 (2017).
38. Yanikgonul, S. *et al*. Integrated avalanche photodetectors for visible light. *Nat. Commun.* **12**, 1834 (2021).
39. Guo, Y. *et al*. Field dependent and high light sensitive organic phototransistors based on linear asymmetric organic semiconductor. *Applied Physics Letters* **94**, 143303 (2009).
40. Huang, J. *et al*. A High-Performance Solution-Processed Organic Photodetector for Near-Infrared Sensing. *Advanced Materials* **32**, 1906027 (2020).
41. Liu, M. *et al*. Interfacial Engineering for Photomultiplication Type Organic Photodetectors with Signal-Noise-Ratio Over 89 000. *Advanced Optical Materials* **12**, 2303216 (2024).
42. Liu, T. *et al.* Near Infrared Self-Powered Organic Photodetectors with a Record Responsivity Enabled by Low Trap Density. *Advanced Functional Materials* **33**, 2301167 (2023).
43. Rai, S. C. *et al*. Piezo-phototronic Effect Enhanced UV/Visible Photodetector Based on Fully Wide Band Gap Type-II ZnO/ZnS Core/Shell Nanowire Array. *ACS Nano* **9**, 6419–6427 (2015).
44. Rai, S. C. *et al*. Enhanced Broad Band Photodetection through Piezo-Phototronic Effect in CdSe/ZnTe Core/Shell Nanowire Array. *Advanced Electronic Materials* **1**, 1400050 (2015).
45. Su, Y. *et al*. Piezo-phototronic UV photosensing with ZnO nanowires array. in 2015 *IEEE SENSORS* 1–4 (2015).
46. Zhou, W. *et al*. Solution-processed upconversion photodetectors based on quantum dots. *Nat. Electron.* **3**, 251–258 (2020).
47. Guo, L. *et al*. Patterned 2D Ferroelectric Perovskite Single-Crystal Arrays for Self-Powered UV Photodetector Boosted by Combining Ferro-Pyro-Phototronic and Piezo-Phototronic Effects. *Nano Lett.* **22**, 8241–8249 (2022).
48. Mishra, H. K. *et al*. All Organic Aqueous Processable Piezo-Phototronic Ink for Strain Modulated Photoresponse. *Advanced Materials Technologies* **8**, 2201350 (2023).
49. Arora, H. *et al*. Effective Hexagonal Boron Nitride Passivation of Few-Layered InSe and GaSe to Enhance Their Electronic and Optical Properties. *ACS Applied Materials & Interfaces* **11**, 43480–43487 (2019).
50. Montazeri, K. *et al*. Beyond Gold: Spin-Coated Ti3C2-Based MXene Photodetectors. *Advanced Materials* **31**, 1903271 (2019).
51. Nasiri, N. *et al*. Ultraporous Electron-Depleted ZnO Nanoparticle Networks for Highly Sensitive Portable Visible-Blind UV Photodetectors. *Advanced Materials* **27**, 4336–4343 (2015).
52. Dong, R. *et al*. High-Gain and Low-Driving-Voltage Photodetectors Based on Organolead Triiodide Perovskites. *Advanced Materials* **27**, 1912–1918 (2015).
53. Zhao, T. *et al*. Nanoscale-Thick CuPc/β-Ga2O3 p–n Junctions for Harsh-Environment-Resistant Self-Powered Deep-UV Photodetectors. *ACS Appl. Nano Mater.* **6**, 3856–3862 (2023).
54. Sarker, B. K. *et al*. Position-dependent and millimetre-range photodetection in phototransistors with micrometre-scale graphene on SiC. *Nat. Nanotech.* **12**, 668–674 (2017).
55. Gong, X. *et al*. High-Detectivity Polymer Photodetectors with Spectral Response from 300 nm to 1450 nm. *Science* **325**, 1665–1667 (2009).
56. Peng, M. *et al*. Flexible Self-Powered GaN Ultraviolet Photoswitch with Piezo-Phototronic Effect Enhanced On/Off Ratio. *ACS Nano* **10**, 1572–1579 (2016)
57. Dai, Y. *et al*. Largely Improved Near-Infrared Silicon-Photosensing by the Piezo-Phototronic Effect. *ACS Nano* **11**, 7118–7125 (2017)
58. Dong Jin Lee *et al*. Piezo-phototronic effect triggered flexible UV photodetectors based on ZnO nanosheets/GaN nanorods arrays, *Applied Surface Science*, **558**, 149896(2021).
59. Zhang, X. *et al*. Stable ultra-fast broad-bandwidth photodetectors based on α-CsPbI3 perovskite and NaYF4:Yb,Er quantum dots. *Nanoscale* **9**, 6278–6285 (2017).
60. Peng, W. *et al*. Enhanced Performance of a Self-Powered Organic/Inorganic Photodetector by Pyro-Phototronic and Piezo-Phototronic Effects. *Advanced Materials* **29**, 1606698 (2017).
61. Lai, Q. *et al*. Piezo-phototronic Effect Enhanced Photodetector Based on CH3NH3PbI3 Single Crystals. *ACS Nano* **12**, 10501–10508 (2018).
62. Maity, K. *et al*. Piezo-phototronic effect in highly stable CsPbI3-PVDF composite for self-powered nanogenerator and photodetector. *Nano Energy* **92**, 106743 (2022).
63. Mallick, Z. *et al*. Piezo-phototronic effect in highly stable lead-free double perovskite Cs2SnI6-PVDF nanocomposite: Possibility for strain modulated optical sensor. *Nano Energy* **100**, 107451 (2022).
64. Yuan, H. *et al*. Polarization-sensitive broadband photodetector using a black phosphorus vertical p–n junction. *Nat. Nanotech.* **10**, 707–713 (2015).
65. Palaferri, D. *et al*. Room-temperature nine-µm-wavelength photodetectors and GHz-frequency heterodyne receivers. *Nature* **556**, 85–88 (2018).
66. Youngblood, N. *et al*. Waveguide-integrated black phosphorus photodetector with high responsivity and low dark current. *Nat. Photon.* **9**, 247–252 (2015).
67. Dai, Y. *et al*. Self-Powered Si/CdS Flexible Photodetector with Broadband Response from 325 to 1550 nm Based on Pyro-phototronic Effect: An Approach for Photosensing below Bandgap Energy. *Advanced Materials* **30**, 1705893 (2018).
68. Yu, X.-X. *et al*. A novel high-performance self-powered UV-vis-NIR photodetector based on a CdS nanorod array/reduced graphene oxide film heterojunction and its piezo-phototronic regulation. *J. Mater. Chem. C* **6**, 630–636 (2018).
69. Li, L. *et al*. An Electrically Modulated Single-Color/Dual-Color Imaging Photodetector. *Advanced Materials* **32**, 1907257 (2020).
70. Cui, Q. H. *et al*. Coaxial Organic p-n Heterojunction Nanowire Arrays: One-Step Synthesis and Photoelectric Properties. *Advanced Materials* **24**, 2332–2336 (2012).
71. Jeong, W.-I. *et al*. Photoconductivity of C60 as an Origin of Bias-Dependent Photocurrent in Organic Photovoltaics. *Advanced Functional Materials* **22**, 3089–3094 (2012).
72. Arora, H. *et al*. Demonstration of a Broadband Photodetector Based on a Two-Dimensional Metal–Organic Framework. *Advanced Materials* **32**, 1907063 (2020).
73. Xia, F. *et al*. Ultrafast graphene photodetector. *Nat. Nanotech.* **4**, 839–843 (2009).
74. Manga, K. K. *et al*. High-Performance Broadband Photodetector Using Solution-Processible PbSe–TiO2–Graphene Hybrids. *Advanced Materials* **24**, 1697–1702 (2012).
75. Li, T. *et al.* Sensitive photodetection below silicon bandgap using quinoid-capped organic semiconductors. *Science Advances* **9**, eadf6152 (2023).
76. Ollearo, R. *et al*. Vitality surveillance at distance using thin-film tandem-like narrowband near-infrared photodiodes with light-enhanced responsivity. *Science Advances* **9**, eadf9861 (2023).
77. Li, T. *et al*. Highly sensitive water pollution monitoring using colloid-processed organic photodetectors. *Nat. Water* 2, 577–588 (2024).
78. Lian, Y. *et al*. Band Alignment Semimetal Heterojunction-Based Ultrabroadband Photodetector for Noncontact Gesture Interaction with Low Latency. *Advanced Materials* 37, 2404336 (2025).
